# Supplementary material for: Taxes and Subsidies for Improving Diet and Population Health in Australia: A Cost-Effectiveness Modelling Study
Source: PubMed Central journal article supplement (PMC5308803; doi:10.1371/journal.pmed.1002232), 2017-02-14
Supplement: pmed.1002232.s002.pdf [file pmed.1002232.s002.pdf]

**Table S1** The change in price of some typical products.

| <b>Supermarket product</b>                     | <b>Old price</b> | <b>New price</b> | <b>Change in price for a typical serve</b> |
|------------------------------------------------|------------------|------------------|--------------------------------------------|
| Cadbury milk chocolate bar 50g                 | \$2.02           | \$2.22           | \$0.20 per 50g bar                         |
| Nestle Peters Ice Cream Original Vanilla 2L    | \$6.09           | \$10.05          | \$0.20 per 100mL serve                     |
| Coca Cola Soft Drink Coke Bottle Chilled 600mL | \$3.00           | \$3.28           | \$0.18 per 375mL can                       |
| Coles Sausages Classic Beef 560g               | \$3.30           | \$3.87           | \$0.19 per 2 thick sausages (188g)         |
| McCain Pizza Family Supreme Frozen 500g        | \$6.53           | \$7.12           | \$0.19 per 2 slices of 30cm pizza (158g)   |
| Coles Fresh Apples - Pink Lady Prepacked 1kg   | \$5.78           | \$4.37           | -\$0.20 per 1 medium apple (140g)          |

NB. All prices are shown in 2010 Australian dollars. The average change in price across all products was 10%.
