# Supplementary material for: Taxes and Subsidies for Improving Diet and Population Health in Australia: A Cost-Effectiveness Modelling Study
Source: PubMed Central journal article supplement (PMC5308803; doi:10.1371/journal.pmed.1002232), 2017-02-14
Supplement: pmed.1002232.s004.pdf [file pmed.1002232.s004.pdf]

**Table S2** Market share of the three largest product retailers (by retail volume), by food and drink category

| <b>Category</b>                                                               | <b>Market share</b> |
|-------------------------------------------------------------------------------|---------------------|
| Tea                                                                           | 0%                  |
| Coffee                                                                        | 0%                  |
| Juice                                                                         | 20%                 |
| Beverage flavourings sugar                                                    | 10%                 |
| Beverage flavourings diet                                                     | 0%                  |
| Drinks sugar                                                                  | 43%                 |
| Drinks diet                                                                   | 0%                  |
| Energy drinks sugar                                                           | 23%                 |
| Energy drinks diet                                                            | 0%                  |
| Beverage powder                                                               | 0%                  |
| Rice and other cereal grains and starches - refined                           | 0%                  |
| Rice and other cereal grains and starches - whole                             | 0%                  |
| Regular breads, and bread rolls (plain/unfilled/untopped varieties) - refined | 0%                  |
| Regular breads, and bread rolls (plain/unfilled/untopped varieties) - whole   | 0%                  |
| English-style muffins, flat breads, and savoury and sweet breads              | 0%                  |
| Pasta and pasta products                                                      | 3%                  |
| Breakfast cereals, ready to eat                                               | 4%                  |
| Breakfast cereals, hot porridge style                                         | 0%                  |
| Sweet biscuits                                                                | 6%                  |
| Savoury biscuits and crackers                                                 | 25%                 |
| Cakes, buns, muffins, scones, cake-type desserts                              | 8%                  |
| Sweet pastry products                                                         | 0%                  |
| Pies, pasties and sausage rolls                                               | 0%                  |
| Savoury pastries other                                                        | 0%                  |
| Breadcrumbs                                                                   | 0%                  |
| Batter products (pancakes, waffles, doughnuts, crumpets, coating, etc.)       | 0%                  |
| Butter and dairy blends                                                       | 6%                  |
| Margarine                                                                     | 0%                  |
| Oils                                                                          | 4%                  |
| Fish and seafood fresh                                                        | 0%                  |
| Fish and seafood canned/bottled                                               | 0%                  |
| Fish and seafood frozen and/or fried                                          | 8%                  |
| Pome fruit                                                                    | 0%                  |
| Berries                                                                       | 0%                  |
| Citrus fruit                                                                  | 0%                  |
| Stone fruit                                                                   | 0%                  |
| Tropical fruit                                                                | 0%                  |
| Vine fruit                                                                    | 0%                  |
| Mixtures of two or more fruits                                                | 0%                  |
| Dried fruit, preserved fruit                                                  | 0%                  |
| Fruit-based desserts                                                          | 11%                 |
| Eggs                                                                          | 0%                  |
| Egg products and dishes                                                       | 0%                  |
| Beef meat                                                                     | 0%                  |
| Lamb meat                                                                     | 0%                  |

---

|                                              |     |
|----------------------------------------------|-----|
| Pork meat                                    | 0%  |
| Veal meat                                    | 0%  |
| Game meat                                    | 0%  |
| Poultry meat                                 | 0%  |
| Liver, kidneys, tripe                        | 0%  |
| Sausages and frankfurts                      | 0%  |
| Bacon and deli meat                          | 17% |
| Whole milk                                   | 29% |
| Reduced fat/skim milk                        | 26% |
| Milk powder skim                             | 17% |
| Yoghurt                                      | 18% |
| Cream                                        | 27% |
| Cheese                                       | 31% |
| Ice cream                                    | 31% |
| Dairy-based desserts                         | 28% |
| Flavoured milk                               | 35% |
| Milk substitute                              | 0%  |
| Milk substitute flavoured                    | 0%  |
| Milk substitute ice cream                    | 25% |
| Meat alternatives                            | 14% |
| Soup                                         | 7%  |
| Seeds                                        | 0%  |
| Nuts, nut butters, coconut milk, satay sauce | 13% |
| Gravies and sauces                           | 6%  |
| Casserole base, powder                       | 14% |
| Chutneys and relishes                        | 0%  |
| Dressings                                    | 12% |
| Stuffing                                     | 0%  |
| Dips                                         | 17% |
| Potatoes plain                               | 0%  |
| Potatoes fried                               | 0%  |
| Cabbage, cauliflower and similar brassicas   | 0%  |
| Carrot and similar root vegetables           | 0%  |
| Leaf and stalk vegetables                    | 0%  |
| Peas and beans                               | 0%  |
| Tomatoes                                     | 0%  |
| Other fruiting vegetables                    | 0%  |
| Mixed vegetables, onion and garlic           | 0%  |
| Legumes/pulses dried                         | 0%  |
| Legume/pulse products                        | 0%  |
| Legumes/pulses canned                        | 0%  |
| Savoury snacks                               | 0%  |
| Sugar, honey and syrups                      | 8%  |
| Sweet spreads                                | 0%  |
| Sugar-based desserts                         | 0%  |
| Chocolate and chocolate-based confectionery  | 25% |
| Confectionery-type bars                      | 9%  |
| Cereal, fruit, nut and seed bars             | 21% |
| Other confectionery                          | 44% |

---

---

|                            |     |
|----------------------------|-----|
| Meal replacement powders   | 0%  |
| Savoury spreads and pastes | 33% |
| Artificial sweetener       | 0%  |
| Dried herbs and spices     | 0%  |
| Salt                       | 0%  |
| Stock powder               | 17% |
| Stock liquid               | 0%  |
| Baking powder              | 0%  |

---

NB. Market share determined from Euromonitor data for Australia
